# A Label-Free Luminescent Switch-On Assay for ATP Using a G-Quadruplex-Selective Iridium(III) Complex

Ka-Ho Leung<sup>1,2</sup>, Lihua Lu<sup>1,2</sup>, Modi Wang<sup>1</sup>, Tsun-Yin Mak<sup>1</sup>, Daniel Shiu-Hin Chan<sup>1</sup>, Fung-Kit Tang<sup>1</sup>, Chung-Hang Leung<sup>2</sup>, Hiu-Yee Kwan<sup>3</sup>, Zhiling Yu<sup>3</sup>, Dik-Lung Ma<sup>1\*</sup>

**1** Department of Chemistry, Hong Kong Baptist University, Kowloon Tong, Hong Kong, China, **2** State Key Laboratory of Quality Research in Chinese Medicine, Institute of Chinese Medical Sciences, University of Macau, Macao, China, **3** Center for Cancer and Inflammation Research, School of Chinese Medicine, Hong Kong Baptist University, Hong Kong, China

## Abstract

We report herein the G-quadruplex-selective property of a luminescent cyclometallated iridium(III) complex for the detection of adenosine-5'-triphosphate (ATP) in aqueous solution. The ATP-binding aptamer was employed as the ATP recognition unit, while the iridium(III) complex was used to monitor the formation of the G-quadruplex structure induced by ATP. The sensitivity and fold enhancement of the assay were higher than those of the previously reported assay using the organic dye crystal violet as a fluorescent probe. This label-free luminescent switch-on assay exhibits high sensitivity and selectivity towards ATP with a limit of detection of 2.5  $\mu$ M.

**Citation:** Leung K-H, Lu L, Wang M, Mak T-Y, Chan D-S-H, et al. (2013) A Label-Free Luminescent Switch-On Assay for ATP Using a G-Quadruplex-Selective Iridium(III) Complex. PLoS ONE 8(10): e77021. doi:10.1371/journal.pone.0077021

**Editor:** Andrew C. Marr, Queen's University Belfast, United Kingdom

**Received:** June 29, 2013; **Accepted:** August 26, 2013; **Published:** October 25, 2013

**Copyright:** © 2013 Leung et al. This is an open-access article distributed under the terms of the Creative Commons Attribution License, which permits unrestricted use, distribution, and reproduction in any medium, provided the original author and source are credited.

**Funding:** This work is supported by Hong Kong Baptist University (FRG2/11-12/009, FRG2/12-13/021), Centre for Cancer and Inflammation Research, School of Chinese Medicine (CCIR-SCM, HKBU), the Health and Medical Research Fund (HMRG/11101212), the Research Grants Council (HKBU/201811 and HKBU/204612), the French National Research Agency/Research Grants Council Joint Research Scheme (A-HKBU201/12), the Science and Technology Development Fund, Macao SAR (001/2012/A) and the University of Macau (MYRG091(Y2-L2)-ICMS12-LCH and MYRG121(Y2-L2)-ICMS12-LCH). The funders had no role in study design, data collection and analysis, decision to publish, or preparation of the manuscript.

**Competing Interests:** The authors have declared that no competing interests exist.

\* E-mail: edmondma@hkbu.edu.hk

These authors contributed equally to this work.

## Introduction

Adenosine-5'-triphosphate (ATP) plays a fundamental role in the normal physiological function of living organisms as the energy carrier of the cell [1]. It also involved in a variety of cellular metabolic and biochemical pathways. However, an abnormal concentration of physiological ATP has been implicated in the development of various diseases, such as angiocardopathy [2]. Traditional analytical techniques for monitoring ATP concentration include mass spectrometry [3], enzyme-linked immunosorbent assays (ELISA) [4] and capillary electrophoresis (CE) [5]. However, these methods typically require expensive instrumentation and/or tedious sample preparation. As a consequence, it is desirable to develop more simple and rapid methods for the quantification of ATP.

Aptamers are short functional DNA or RNA oligonucleotides, produced *via* Systematic Evolution of Ligands by EXponential enrichment (SELEX), that bind to target molecules with high affinity and selectivity [6]. Some aptamers undergo conformational changes upon binding to the target molecules, allowing an appropriate DNA-interacting element to transduce the binding event into a luminescent, colorimetric, or electrochemical signal [7,8,9,10,11,12]. The binding affinity of the ATP aptamer towards ATP has been described previously [13]. Using the ATP aptamer, a variety of oligonucleotide-based ATP detection platforms with luminescent [7,14,15,16,17,18,19,20,21,22], colorimetric [23,24], or electrochemical [25,26,27] outputs have been reported.

We have previously reported an ATP detection platform utilizing the organic dye crystal violet (CV) to monitor the ATP-induced G-quadruplex [14]. However, the sensitivity of the assay was limited somewhat by the promiscuous binding of CV to multiple DNA conformations. Meanwhile, transition metal complexes have emerged as attractive candidates for G-quadruplex-sensing applications due to the following reasons: (i) the long lifetime of <sup>3</sup>MLCT phosphorescence enhances image signal stability and reduces background fluorescence noise, (ii) metal complexes can be made by simple synthetic protocols, (iii) the photophysical properties of metal complexes can be tuned by adjustment of the auxiliary ligands, and (iv) the relatively large Stokes shifts helps to prevent self-quenching [28,29,30,31,32,33,34,35,36,37,38]. Encouraged by the previous application of G-quadruplex-selective metal complexes in DNA-based sensing platforms [13,39,40,41,42,43], we sought to improve the sensitivity of our previous ATP detection assay by employing an iridium(III) complex as a G-quadruplex probe.

## Materials and Methods

### Materials

Reagents were purchased from Sigma Aldrich and used as received. Iridium chloride hydrate (IrCl<sub>3</sub>.xH<sub>2</sub>O) was purchased from Precious Metals Online. All reagents were used without further purification. Milli-Q purified water was used to prepare all solutions. All oligonucleotides were synthesized by Techdragon

**Table 1.** The sequences of the nucleic acid used in the study.

|                                         |                                    |
|-----------------------------------------|------------------------------------|
| ATP aptamer                             | 5'-AACCTGGGGGAGTATTGCGGAGGAAGGT-3' |
| ATP aptamer complementary strand        | 5'-ACCTTCCTCCGCAATACTCCCCAGGTT-3'  |
| ATP aptamer mutant                      | 5'-AACCTGTTTGAGTATTGCGGAGTAAGTT-3' |
| ATP aptamer mutant complementary strand | 5'-AACTTTCTCCGCAATACTCAACAGGTT-3'  |
| HTS                                     | 5'-TTAGGGTTAGGGTTAGGGTTAGGG-3'     |
| H21                                     | 5'-GGGTTAGGGTTAGGG TTAGGG-3'       |
| ssDNA                                   | 5'- GAAATTCTTAAGTGCATCGAG -3'      |

doi:10.1371/journal.pone.0077021.t001

Inc. (Hong Kong, China). The sequences of the nucleic acid used in the study are displayed in Table 1. The TRAMPC1 (ATCC® CRL2730™) cell line were purchased from American Type Culture Collection (Manassas, VA 20108 USA).

### General Experimental

Mass spectrometry was performed at the Mass Spectroscopy Unit at the Department of Chemistry, Hong Kong Baptist University, Hong Kong (China). Elemental analysis was performed at Atlantic Microlab Inc. (Norcross, GA, USA).

Deuterated solvents for NMR purposes were obtained from Armar and used as received.  $^1\text{H}$  and  $^{13}\text{C}$  NMR were recorded on a Bruker Avance 400 spectrometer operating at 400 MHz ( $^1\text{H}$ ) and 100 MHz ( $^{13}\text{C}$ ).  $^1\text{H}$  and  $^{13}\text{C}$  chemical shifts were referenced internally to solvent shift ( $\text{CD}_3\text{CN}$ :  $^1\text{H}$ ,  $\delta$ 1.94,  $^{13}\text{C}$ ,  $\delta$ 118.7;  $\text{d}_6$ -DMSO:  $^1\text{H}$ ,  $\delta$ 2.50,  $^{13}\text{C}$   $\delta$ 39.5). Chemical shifts ( $\delta$ ) are quoted in ppm, the downfield direction being defined as positive. Uncertainties in chemical shifts are typically  $\pm 0.01$  ppm for  $^1\text{H}$  and  $\pm 0.05$  for  $^{13}\text{C}$ . Coupling constants are typically  $\pm 0.1$  Hz for  $^1\text{H}$ - $^1\text{H}$  and  $\pm 0.5$  Hz for  $^1\text{H}$ - $^{13}\text{C}$  couplings. The following abbreviations are used for convenience in reporting the multiplicity of NMR resonances: s, singlet; d, doublet; t, triplet; q, quartet; m, multiplet; br, broad. All NMR data was acquired and processed using standard Bruker software (Topspin).

Absorption spectra were recorded on a Cary 300 UV/Vis spectrometer. Emission spectra were recorded on a PTI QM4 spectrometer. Quantum yields and lifetime measurements were performed on a PTI TimeMaster C720 Spectrometer (Nitrogen laser: pulse output 337 nm) fitted with a 380 nm filter. Error limits

were estimated:  $\lambda$  ( $\pm 1$  nm);  $\tau$  ( $\pm 10\%$ );  $\Phi$  ( $\pm 10\%$ ). All solvents used for the quantum yield and lifetime measurements were degassed using three cycles of freeze-vac-thaw.

Luminescence emission spectra were recorded on a PTI QM4 spectrofluorometer (Photo Technology International, Birmingham, NJ) at  $25^\circ\text{C}$ , with the slits for both excitation and emission set at 2.5 nm. The sample cell was a 0.7 mL quartz cuvette. The luminescence intensity at 550–750 nm was monitored after excitation of the sample at 360 nm with a xenon lamp excitation source, using  $90^\circ$  angle detection for the solution samples.

### Synthesis of $[\text{Ir}(\text{ppy})_2(\text{biq})]\text{PF}_6$ (1) and $[\text{Ir}(\text{piq})_2(\text{biq})]\text{PF}_6$ (2)

The following compounds were prepared using literature methods:  $[\text{Ir}_2(\text{ppy})_4\text{Cl}_2]$ ,  $[\text{Ir}_2(\text{piq})_4\text{Cl}_2]$  [44] and  $[\text{Ir}(\text{ppy})_2(\text{biq})]\text{PF}_6$  (1),  $[\text{Ir}(\text{piq})_2(\text{biq})]\text{PF}_6$  (2) [44] and characterized by  $^1\text{H}$ -NMR,  $^{13}\text{C}$ -NMR and HRMS.

### Emission Response of 2 Towards Different Forms of DNA

The G-quadruplex DNA-forming sequences (HTS and H21) were annealed by incubating at  $95^\circ\text{C}$  for 10 min, allowed to cool to room temperature at  $0.1^\circ\text{C}/\text{s}$  in Tris-HCl buffer (25 mM Tris, 50 mM KCl, pH 7.0) and stored at  $-20^\circ\text{C}$  before use. **2** (1  $\mu\text{M}$ ) was added to 5  $\mu\text{M}$  of ss DNA, ct DNA or G-quadruplex DNA in 500  $\mu\text{L}$  of Tris-HCl buffer (25 mM Tris, pH 7.0). Emission spectra were recorded in 550–700 nm range using an excitation wavelength of 360 nm.

### G-quadruplex Fluorescent Intercalator Displacement (G4-FID Assay)

The FID assay was performed as previously described [42]. The ATP aptamer G-quadruplex (0.25  $\mu\text{M}$ ) in Tris-HCl buffer (50 mM Tris, 100 mM KCl, pH 7.0) was annealed by heating at  $95^\circ\text{C}$  for 10 min. Thiazole orange (0.5  $\mu\text{M}$ ) was added and the

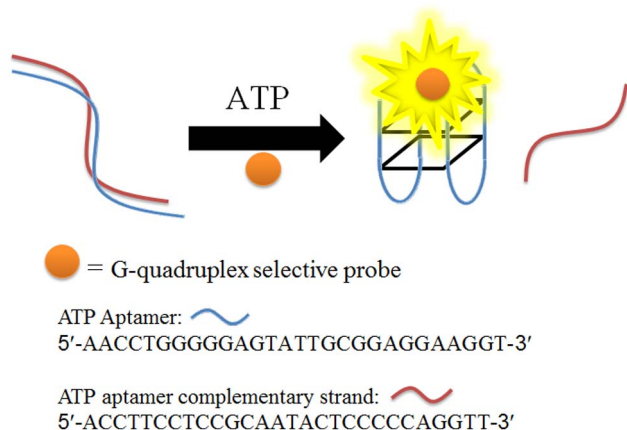

**Figure 1. Schematic illustration of the G-quadruplex-based assay for the detection of ATP.**

doi:10.1371/journal.pone.0077021.g001

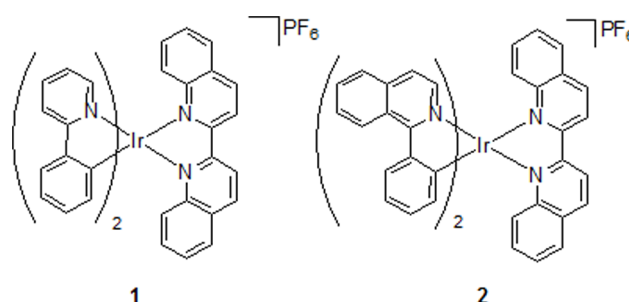

**Figure 2. Chemical structure of cyclometallated iridium(III) complexes 1 and 2.**

doi:10.1371/journal.pone.0077021.g002

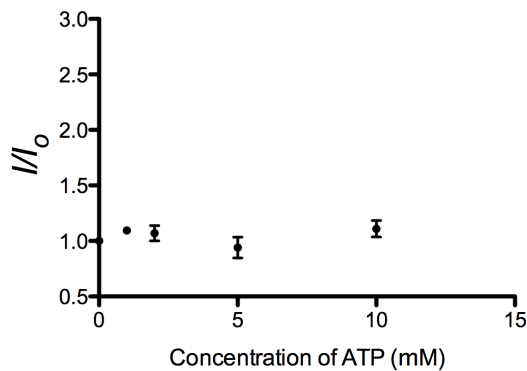

**Figure 3. Emission spectrum of the 1/duplex system in response to various concentrations of ATP: 0, 1, 2, 5 and 10 mM.  $\lambda_{\text{ex}} = 360$  nm.**

doi:10.1371/journal.pone.0077021.g003

mixture was incubated for 1 h. Emission measurements were recorded after each addition of the indicated concentrations of complexes, following an equilibration time of 5 min after each addition. The fluorescence area was converted into percentage of displacement (PD) by using the following equation.  $PD = 100 - [(FA/FA_0) \times 100]$  ( $FA_0$  = fluorescence area of DNA-TO complex in the absence of complexes; FA = fluorescence area in the presence of complexes).

#### Complex 2 as a G-quadruplex Probe for Oligonucleotide-based ATP Detection

12.5  $\mu\text{L}$  of 100  $\mu\text{M}$  ATP aptamer and its complementary DNA was mixed in hybridization buffer (50  $\mu\text{L}$ , 20 mM Tris-HCl, pH 7.3). The mixture was annealed at 90°C for 10 min, and was slowly cooled down from 90°C to 25°C. This stock solution of 25  $\mu\text{M}$  duplex DNA was stored at -20°C for further use. In the emission measurement, the duplex strand stock solution was diluted with Tris-HCl buffer (20 mM, pH 7.3) to obtain a 0.25  $\mu\text{M}$  (in final volume 500  $\mu\text{L}$ ) aptamer duplex solution in a cuvette. Various concentrations of ATP (final concentration ranging from 0 to 10 mM) were added to each cuvette, followed by the addition 1  $\mu\text{L}$  of 500  $\mu\text{M}$  of the G-quadruplex probe at a final concentration of 1  $\mu\text{M}$ . The mixture was allowed to equilibrate at 25°C for 10 min.

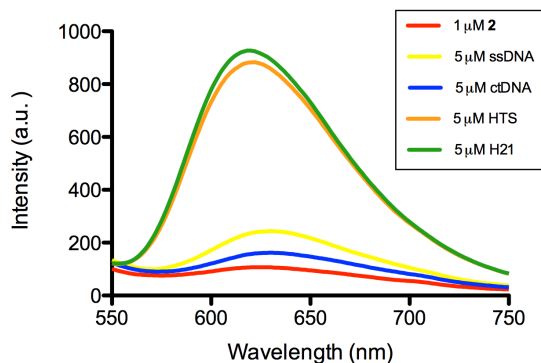

**Figure 4. Luminescence response of complex 2 (1  $\mu\text{M}$ ) in the presence of 5  $\mu\text{M}$  of single stranded DNA (ssDNA), calf-thymus DNA (ctDNA) or various G-quadruplexes (HTS, H21).  $\lambda_{\text{ex}} = 360$  nm.**

doi:10.1371/journal.pone.0077021.g004

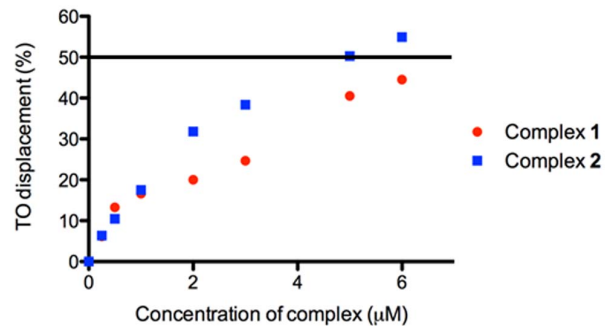

**Figure 5. G4-FID titration curves of the ATP G-quadruplex in the presence of increasing concentration of complex 1 and 2 in Tris-HCl buffer (50 mM Tris, pH 7.0, 100 mM KCl).  $DC_{50}$  value is determined by half-maximal concentration of compound required to displace 50% TO from DNA.**

doi:10.1371/journal.pone.0077021.g005

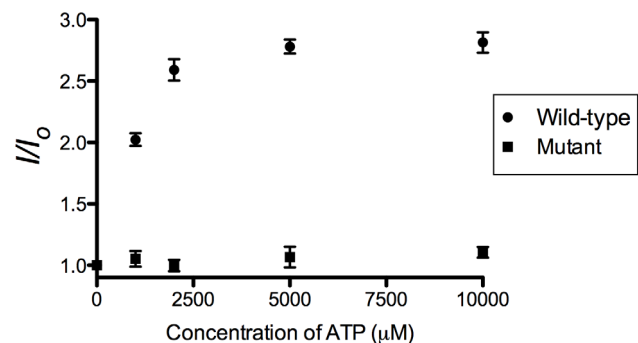

**Figure 6. Emission spectrum of the 2/duplex (wild-type/mutant) system in response to various concentrations of ATP: 0, 1, 2, 5 and 10 mM.  $\lambda_{\text{ex}} = 360$  nm.**

doi:10.1371/journal.pone.0077021.g006

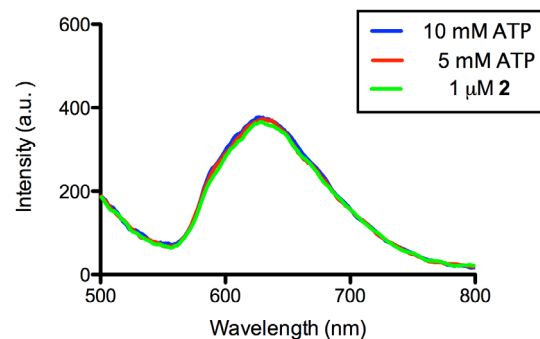

**Figure 7. Emission spectrum of the 2 upon addition of 5 and 10 mM ATP.  $\lambda_{\text{ex}} = 360$  nm.**

doi:10.1371/journal.pone.0077021.g007

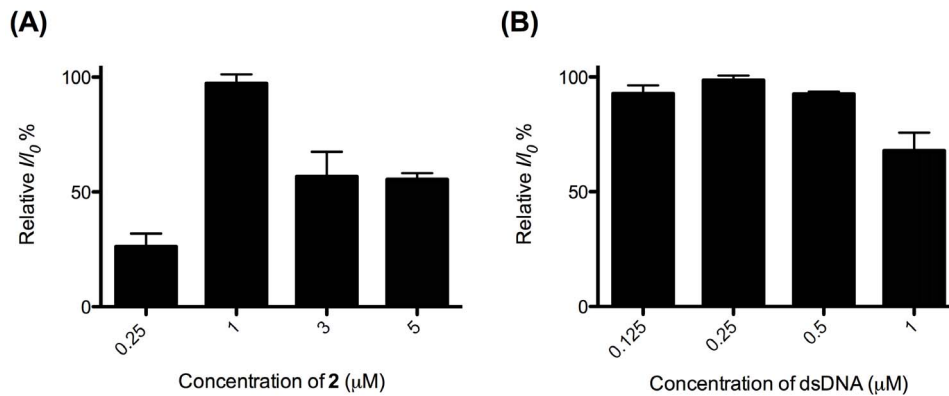

**Figure 8. Relative luminescence intensity of the system (A) ([dsDNA]=2  $\mu\text{M}$ , [ATP]=5 mM) in the presence of different concentrations of complex **2** (0.25, 1, 3 and 5  $\mu\text{M}$ ) in aqueous buffered solution (50 mM Tris, pH 7.2). (B) ([complex **2**]=1  $\mu\text{M}$ , [ATP]=5 mM) at various concentrations of the dsDNA (0.25, 0.5, 1.5 and 3  $\mu\text{M}$ ) in aqueous buffered solution (50 mM Tris, pH 7.2). Error bars represent the standard deviations of the results from three independent experiments. doi:10.1371/journal.pone.0077021.g008**

### Total Cell Extract Preparation

The TRAMPC1 (ATCC® CRL2730™) cell line were purchased from American Type Culture Collection (Manassas, VA 20108 USA). Prostate cancer cells were trypsinized and resuspended in TE buffer (10 mM Tris-HCl 7.4, 1 mM EDTA). After incubation on ice for 10 min, the lysate was centrifuged and the supernatant was collected. The cell extract was then spiked with ATP and the luminescence spectra were recorded after the addition of **2** (1  $\mu\text{M}$ ) and DNA duplex (0.25  $\mu\text{M}$ ) and equilibration at 25°C for 10 min.

### Results and Discussion

The mechanism of this ATP sensing platform is depicted in Figure 1. Initially, the ATP aptamer hybridizes with its complementary sequence to form a double-stranded DNA (dsDNA) structure. In the absence of ATP, DNA duplex interacts weakly with the G-quadruplex-selective iridium(III) complex, resulting in a low emission signal. The addition of ATP induces the dissociation of the duplex structure *via* the formation of an aptamer-target complex, in which the ATP aptamer adopts a G-quadruplex structure. The strong interaction of the iridium(III) complex with the G-quadruplex motif results in an enhanced luminescence response.

To evaluate the feasibility of this strategy, we first investigated the luminescence intensity of the system in response to different concentrations of ATP, and utilizing the previously reported G-quadruplex-selective cyclometallated iridium(III) complex **1** [Ir(p-

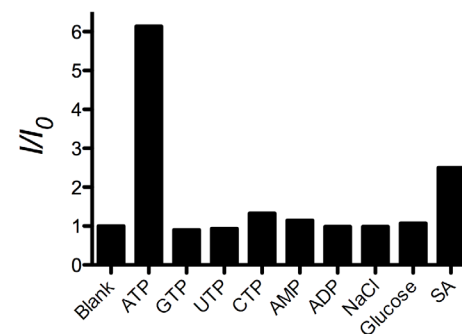

**Figure 10. Luminescence fold change of the system for 1 mM of ATP, 10 mM of uridine 5'-triphosphate (UTP), guanosine 5'-triphosphate (GTP), cytidine 5'-triphosphate (CTP), adenosine 5'-diphosphate (ADP), adenosine 5'-monophosphate (AMP), 300 mM NaCl, 2% glucose and 0.05% serum albumin (SA). doi:10.1371/journal.pone.0077021.g010**

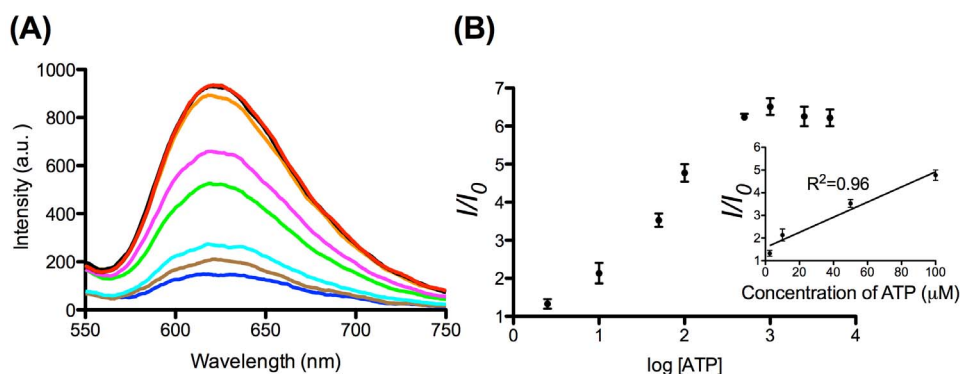

**Figure 9. Emission spectrum of the **2**/duplex system ([**2**]=1  $\mu\text{M}$ , [dsDNA]=0.25  $\mu\text{M}$ ) in the presence of increasing concentrations of ATP (0, 2.5, 10, 50, 100, 500, 1000, 2500 and 5000  $\mu\text{M}$ ).  $\lambda_{\text{ex}}$ =360 nm (left). Luminescence response of the system vs. log [ATP]. Inset: linear plot of the change in luminescence intensity of the system vs. ATP concentration (right). doi:10.1371/journal.pone.0077021.g009**

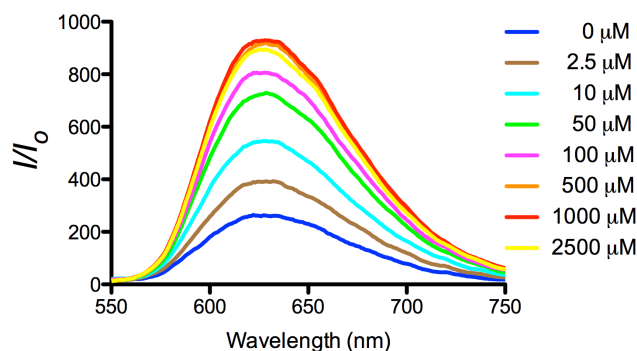

**Figure 11. Emission spectrum of the 2/duplex system** ([**2**] = 1  $\mu$ M, [dsDNA] = 0.25  $\mu$ M) in the presence of increasing concentrations of ATP (0, 2.5, 10, 50, 100, 500, 1000 and 2500  $\mu$ M) in whole cell extracts.  $\lambda_{\text{ex}}$  = 360 nm. doi:10.1371/journal.pone.0077021.g011

py)<sub>2</sub>(biq)]PF<sub>6</sub> (where ppy = 2-phenylpyridine, biq = 2,2'-biquinoline) (Figure 2) as the signal transducer. Surprisingly, no significant increase of luminescence intensity was observed even in the presence of 10 mM of ATP (Figure 3). The low luminescence enhancement of this system was presumably due to the weak interaction between **1** and the ATP aptamer G-quadruplex, as the complex has been reported to only bind to only certain types of G-quadruplex structures [45]. We anticipated that by increasing the size of the ligands, the resulting complex might form superior  $\pi$ -stacking interactions with the G-quadruplex tetrads or loops. Therefore, we investigated the application of complex **2** [Ir(piq)<sub>2</sub>(biq)]PF<sub>6</sub> (where piq = 1-phenylisoquinoline) (Figure 2) containing two planar extended ligands in the label-free G-quadruplex-based ATP sensing platform.

The synthesis and characterization of the cyclometallated iridium(III) complex **2** was performed according to a previous report [44]. We investigated the luminescence response of complex **2** towards various types of DNA, including single-stranded DNA (ssDNA), double-stranded calf-thymus DNA (ctDNA) and pre-annealed G-quadruplex DNA (Figure 4). Complex **2** was weakly emissive in aqueous buffered solution (20 mM Tris, 50 mM KCl, pH 7.0). Encouragingly, the presence of G-quadruplex DNA sequences (HTS, H21) could significantly enhance the luminescence of complex **2**. A maximum 8-fold enhancement was observed in the luminescence intensity of **2** at 5  $\mu$ M of the H21 and HTS G-quadruplex (Figure 4).

To investigate the binding affinity of complex **1** and **2** towards the pre-annealed ATP aptamer G-quadruplex, the G-quadruplex fluorescent intercalator displacement (G4-FID) assay was employed. The results of the G4-FID assay indicated that **2** could displace thiazole orange (TO) from the ATP aptamer G-quadruplex with a  $G^4DC_{50}$  value (half-maximal concentration of compound required to displace 50% TO from DNA) of 5  $\mu$ M, while the  $G^4DC_{50}$  value of **1** was >6  $\mu$ M (Figure 5). This result indicates that complex **2** has higher binding affinity towards the ATP aptamer G-quadruplex compared to complex **1**. We envisage that the strong interaction between complex **2** and the G-quadruplex protects the metal center from the aqueous buffer environment and suppresses non-radiative decay, thus enhancing <sup>3</sup>MLCT emission. By comparison, the addition of ssDNA or ctDNA resulted in only minimal changes in the luminescence of complex **2**. To our knowledge, complex **2** has not previously been reported as a G-quadruplex-selective probe.

Based on established selective luminescence response of complex **2** towards G-quadruplex DNA, we sought to employ

complex **2** in the oligonucleotide-based ATP detection assay. In the absence of ATP, complex **2** was only slightly emissive due to the weak interaction between the metal complex with the duplex substrate (Figure 6). Encouragingly, the luminescence signal of **2** was significantly enhanced in the presence of ATP, presumably due to the formation of the aptamer G-quadruplex induced by ATP.

A number of control experiments were performed to validate the mechanism of the proposed assay. We investigated the response of a modified system involving a mutant sequence (5'-AACCTGTTTGAGTATTGCGGAGTAAGTT-3', base mutants underlined) that cannot form a G-quadruplex due to the lack of critical guanine residues (Figure 6). No luminescence enhancement was observed upon addition of 1, 2, 5 of 10 mM of ATP to the modified system. This suggests that the complex **2** specifically interacts with the G-quadruplex motif formed after the addition of ATP, rather than through non-specific DNA-ATP-**2** ternary interactions. We have previously demonstrated using circular dichroism (CD) spectroscopy that ATP could induce the formation of the G-quadruplex structure from a dsDNA substrate containing the ATP aptamer sequence [14]. Furthermore, incubating complex **2** with 5 or 10 mM of ATP resulted in no significant luminescent enhancement, indicating that the metal complex does not directly interact with ATP (Figure 7).

In order to optimize the luminescence response of this sensing platform, we investigated the effect of the concentration of dsDNA and complex **2**. We observed that the luminescence intensity in the presence of 5 mM ATP attained a maximum intensity when the concentrations of dsDNA and complex **2** were 0.25  $\mu$ M and 1  $\mu$ M, respectively (Figures 8A and B). The luminescence response of this platform increased with ATP concentration and reached saturation at 1 mM of ATP in buffered solution (Figure 9A), with a linear ( $R^2 = 0.96$ ) luminescence response in the range of 2.5–100  $\mu$ M of ATP (Figure 9B). Under the optimized conditions, the maximal fold-change enhancement was improved to 6.5-fold compared to *ca.* 2.5-fold for the unoptimized system (Figure 6). Furthermore, the limit of detection (LoD) recorded using the 3 $\sigma$  method was 2.5  $\mu$ M. The performance of the present system is superior to that in our previous study using the organic dye CV (fold change = 4, LoD = 5  $\mu$ M). We envisage that the superior sensitivity of the present system could be attributed to the highly selective interaction between iridium(III) complex **2** and G-quadruplex DNA. In contrast, CV also interacts significantly with duplex DNA, resulting in a higher fluorescent background signal leading to lower sensitivity and maximal fold-change response.

The selectivity of this platform towards ATP over related analogues such as uridine 5'-triphosphate (UTP), guanosine 5'-triphosphate (GTP), cytidine 5'-triphosphate (CTP), adenosine 5'-diphosphate (ADP) and adenosine 5'-monophosphate (AMP) was also investigated. While a high luminescence signal was recorded in the presence of 1 mM ATP, only small changes in the luminescence intensity of the system was observed in the presence of 10-fold excess amounts of the ATP analogues (Figure 10). Furthermore, we also investigated the selectivity of this ATP detection platform towards other species that may be present in biological samples, such as NaCl, glucose, and serum albumin. The assay did not generate significant luminescence signal in the presence of NaCl (300 mM) or glucose (2%). On the other hand, 0.05% of serum albumin induced an emission enhancement that was 25% that observed with 1 mM of ATP. Overall, these results demonstrate the selectivity of this platform towards ATP. In order

to evaluate the robustness of the system, we investigated the ability of the assay to detect ATP in spiked total cell extracts. Encouragingly, the emission signal of the system was enhanced upon increasing concentrations of ATP (Figure 11). This result demonstrates the potential application of the ATP detection platform for real sample analysis.

## Conclusions

In conclusion, a G-quadruplex-based luminescent iridium(III) switch-on assay has been developed for the selective detection of ATP in aqueous solution. Our sensing platform is label-free, rapid, sensitive, simple, cost-effective, and displays a switch-on response with detection limit 2.5  $\mu$ M. Furthermore, we demonstrated the potential application of this strategy for the detection of ATP in biological samples. This platform is based on the ATP aptamer and the heretofore unreported G-quadruplex-selective property of complex **2**, which exhibit a strong luminescence in the presence of

the ATP-induced G-quadruplex. On the other hand, the original iridium(III) complex **1** was found not to generate luminescence enhancement with the ATP aptamer G-quadruplex, though it had previously been reported to recognize other types of G-quadruplexes. This study highlights the importance of structural modification on the selectivity of luminescent iridium(III) complexes for various G-quadruplex topologies. The exact relationship between iridium(III) complex structure and G-quadruplex selectivity is still under investigation.

## Author Contributions

Conceived and designed the experiments: DLM CHL. Performed the experiments: KHL LL MW TYM FKT HYK. Analyzed the data: KHL LL DSHC HYK. Contributed reagents/materials/analysis tools: DLM CHL ZY. Wrote the paper: KHL DSHC. Directed the research: DLM CHL.

## References

- Pérez-Ruiz T, Martínez-Lozano C, Tomás V, Martín J (2003) Determination of ATP via the photochemical generation of hydrogen peroxide using flow injection luminol chemiluminescence detection. *Anal Bioanal Chem* 377: 189–194.
- Callan J, Mulrooney R, Kamila S (2008) Luminescent Detection of ATP in Aqueous Solution Using Positively Charged CdSe–ZnS Quantum Dots. *J Fluoresc* 18: 1157–1161.
- Manikandan M, Hasan N, Wu H-F (2012) Rapid and direct detection of adenosine triphosphate (ATP) by MALDI-MS using rutile titania chips. *Analyst* 137: 5128–5134.
- Guan X, Zhang H-j, Bi Y-n, Zhang L, Hao D-l (2010) Rapid detection of pathogens using antibody-coated microbeads with bioluminescence in microfluidic chips. *Biomed Microdevices* 12: 683–691.
- Zinellu A, Sotgia S, Scanu B, Pisanu E, Sanna M, et al. (2010) Ultra-fast adenosine 5'-triphosphate, adenosine 5'-diphosphate and adenosine 5'-monophosphate detection by pressure-assisted capillary electrophoresis UV detection. *Electrophoresis* 31: 2854–2857.
- Tuerk C, Gold L (1990) Systematic evolution of ligands by exponential enrichment: RNA ligands to bacteriophage T4 DNA polymerase. *Science* 249: 505–510.
- Ma D-L, He H-Z, Leung K-H, Zhong H-J, Chan DS-H, et al. (2013) Label-free luminescent oligonucleotide-based probes. *Chem Soc Rev* 42: 3427–3440.
- Liu J, Cao Z, Lu Y (2009) Functional Nucleic Acid Sensors. *Chem Rev* 109: 1948–1998.
- Zhang H, Li F, Dever B, Li X-F, Le XC (2012) DNA-Mediated Homogeneous Binding Assays for Nucleic Acids and Proteins. *Chem Rev* 113: 2812–2841.
- Famulok M, Mayer G (2011) Aptamer Modules as Sensors and Detectors. *Acc Chem Res* 44: 1349–1358.
- Wilner OI, Willner I (2012) Functionalized DNA Nanostructures. *Chem Rev* 112: 2528–2556.
- He H-Z, Chan DS-H, Leung C-H, Ma D-L (2013) G-quadruplexes for luminescent sensing and logic gates. *Nucleic Acids Res* 41: 4345–4359.
- Leung K-H, He H-Z, Ma VP-Y, Chan DS-H, Leung C-H, et al. (2013) A luminescent G-quadruplex switch-on probe for the highly selective and tunable detection of cysteine and glutathione. *Chem Commun* 49: 771–773.
- He H-Z, Pui-Yan Ma V, Leung K-H, Shiu-Hin Chan D, Yang H, et al. (2012) A label-free G-quadruplex-based switch-on fluorescence assay for the selective detection of ATP. *Analyst* 137: 1538–1540.
- Wang J, Jiang Y, Zhou C, Fang X (2005) Aptamer-Based ATP Assay Using a Luminescent Light Switching Complex. *Anal Chem* 77: 3542–3546.
- Wang Y, Liu B (2008) ATP detection using a label-free DNA aptamer and a cationic tetrahydrofluorene. *Analyst* 133: 1593–1598.
- Zhou Z, Du Y, Dong S (2011) Double-Strand DNA-Templated Formation of Copper Nanoparticles as Fluorescent Probe for Label-Free Aptamer Sensor. *Anal Chem* 83: 5122–5127.
- Chen Z, Li G, Zhang L, Jiang J, Li Z, et al. (2008) A new method for the detection of ATP using a quantum-dot-tagged aptamer. *Anal Bioanal Chem* 392: 1185–1188.
- Liu F, Zhang J, Chen R, Chen L, Deng L (2011) Highly Effective Colorimetric and Visual Detection of ATP by a DNazyme–Aptamer Sensor. *Chem Biodivers* 8: 311–316.
- Zhang Z, Sharon E, Freeman R, Liu X, Willner I (2012) Fluorescence Detection of DNA, Adenosine-5'-Triphosphate (ATP), and Telomerase Activity by Zinc(II)-Protoporphyrin IX/G-Quadruplex Labels. *Anal Chem* 84: 4789–4797.
- Nakano S, Fukuda M, Tamura T, Sakaguchi R, Nakata E, et al. (2013) Simultaneous Detection of ATP and GTP by Covalently Linked Fluorescent Ribonucleopeptide Sensors. *J Am Chem Soc* 135: 3465–3473.
- Wang Y, Li Z, Weber TJ, Hu D, Lin C-T, et al. (2013) In Situ Live Cell Sensing of Multiple Nucleotides Exploiting DNA/RNA Aptamers and Graphene Oxide Nanosheets. *Anal Chem* 85: 6775–6782.
- Wang J, Wang L, Liu X, Liang Z, Song S, et al. (2007) A Gold Nanoparticle-Based Aptamer Target Binding Readout for ATP Assay. *Adv Mater* 19: 3943–3946.
- Sitaula S, Branch SD, Ali MF (2012) GOx signaling triggered by aptamer-based ATP detection. *Chem Commun* 48: 9284–9286.
- Zuo X, Song S, Zhang J, Pan D, Wang L, et al. (2007) A Target-Responsive Electrochemical Aptamer Switch (TREAS) for Reagentless Detection of Nanomolar ATP. *J Am Chem Soc* 129: 1042–1043.
- Zuo X, Xiao Y, Plaxco KW (2009) High Specificity, Electrochemical Sandwich Assays Based on Single Aptamer Sequences and Suitable for the Direct Detection of Small-Molecule Targets in Blood and Other Complex Matrices. *J Am Chem Soc* 131: 6944–6945.
- Zhang H, Han Y, Guo Y, Dong C (2012) Porphyrin functionalized graphene nanosheets-based electrochemical aptasensor for label-free ATP detection. *J Mater Chem* 22: 23900–23905.
- Zhao Q, Huang C, Li F (2011) Phosphorescent heavy-metal complexes for bioimaging. *Chem Soc Rev* 40: 2508–2524.
- Zhao Q, Li F, Huang C (2010) Phosphorescent chemosensors based on heavy-metal complexes. *Chem Soc Rev* 39: 3007–3030.
- Yang Y, Zhao Q, Feng W, Li F (2012) Luminescent Chemodosimeters for Bioimaging. *Chem Rev* 113: 192–270.
- Shi S, Zhao J, Geng X, Yao T, Huang H, et al. (2010) Molecular “light switch” for G-quadruplexes and i-motif of human telomeric DNA: [Ru(phen)<sub>2</sub>(dppz)]<sup>2+</sup>. *Dalton Trans* 39: 2490–2493.
- Shi S, Zhao J, Gao X, Lv C, Yang L, et al. (2012) Molecular “light switch” for G-quadruplex DNA: cycling the switch on and off. *Dalton Trans* 41: 5789–5793.
- Yao J-L, Gao X, Sun W, Shi S, Yao T-M (2013) [Ru(bpy)<sub>2</sub>dppz-idzo]<sup>2+</sup>: a colorimetric molecular “light switch” and powerful stabilizer for G-quadruplex DNA. *Dalton Trans* 42: 5661–5672.
- Ma D-L, He H-Z, Leung K-H, Chan DS-H, Leung C-H (2013) Bioactive Luminescent Transition-Metal Complexes for Biomedical Applications. *Angew Chem Int Ed* 52: 7666–7682.
- Chan DS-H, Lee H-M, Che C-M, Leung C-H, Ma D-L (2009) A selective oligonucleotide-based luminescent switch-on probe for the detection of nanomolar mercury(II) ion in aqueous solution. *Chem Commun*: 7479–7481.
- Man BY-W, Chan DS-H, Yang H, Ang S-W, Yang F, et al. (2010) A selective G-quadruplex-based luminescent switch-on probe for the detection of nanomolar silver(I) ions in aqueous solution. *Chem Commun* 46: 8534–8536.
- Ma D-L, Xu T, Chan DS-H, Man BY-W, Fong W-F, et al. (2011) A highly selective, label-free, homogenous luminescent switch-on probe for the detection of nanomolar transcription factor NF- $\kappa$ B. *Nucleic Acids Res* 39: e67.
- Leung C-H, Chan DS-H, He H-Z, Cheng Z, Yang H, et al. (2012) Luminescent detection of DNA-binding proteins. *Nucleic Acids Res* 40: 941–955.
- He H-Z, Chan DS-H, Leung C-H, Ma D-L (2012) A highly selective G-quadruplex-based luminescent switch-on probe for the detection of gene deletion. *Chem Commun* 48: 9462–9464.
- He H-Z, Leung K-H, Yang H, Shiu-Hin Chan D, Leung C-H, et al. (2013) Label-free detection of sub-nanomolar lead(II) ions in aqueous solution using a metal-based luminescent switch-on probe. *Biosens Bioelectron* 41: 871–874.
- Leung K-H, Ma VP-Y, He H-Z, Chan DS-H, Yang H, et al. (2012) A highly selective G-quadruplex-based luminescent switch-on probe for the detection of nanomolar strontium(II) ions in sea water. *RSC Adv* 2: 8273–8276.

42. Ma D-L, He H-Z, Chan DS-H, Leung C-H (2013) Simple DNA-based logic gates responding to biomolecules and metal ions. *Chem Sci* 4: 3366–3380.
43. Leung C-H, Zhong H-J, He H-Z, Lu L, Chan DS-H, et al. (2013) Luminescent oligonucleotide-based detection of enzymes involved with DNA repair. *Chem Sci* 4: 3781–3795.
44. Zhao Q, Liu S, Shi M, Wang C, Yu M, et al. (2006) Series of New Cationic Iridium(III) Complexes with Tunable Emission Wavelength and Excited State Properties: Structures, Theoretical Calculations, and Photophysical and Electrochemical Properties. *Inorg Chem* 45: 6152–6160.
45. Leung K-H, He H-Z, Ma VP-Y, Zhong H-J, Chan DS-H, et al. (2013) Detection of base excision repair enzyme activity using a luminescent G-quadruplex selective switch-on probe. *Chem Commun* 49: 5630–5632.
